# Supplementary material for: Single-crystal heterostructured PbTiO3/CdS nanorods with enhanced visible-light-driven photocatalytic performance
Source: Royal Society of Chemistry journal article supplement (doi:10.1039/c5ra07359f), 2015-01-01
Supplement: c5ra07359f1.pdf [file c5ra07359f1.pdf]

## Supporting Information

### Single-crystal Heterostructured PbTiO<sub>3</sub>/CdS Nanorods with Enhanced Visible-light-driven Photocatalytic Performance

Shan Jiang,<sup>a</sup> Zhaohui Ren,<sup>\* a</sup> Ming Li,<sup>a</sup> Siyu Gong,<sup>a</sup> Yifeng Yu,<sup>a</sup> Jingyuan Pei,<sup>b</sup> Xiao Wei,<sup>b</sup> Ge Shen<sup>a</sup> and Gaorong Han<sup>\*a</sup>

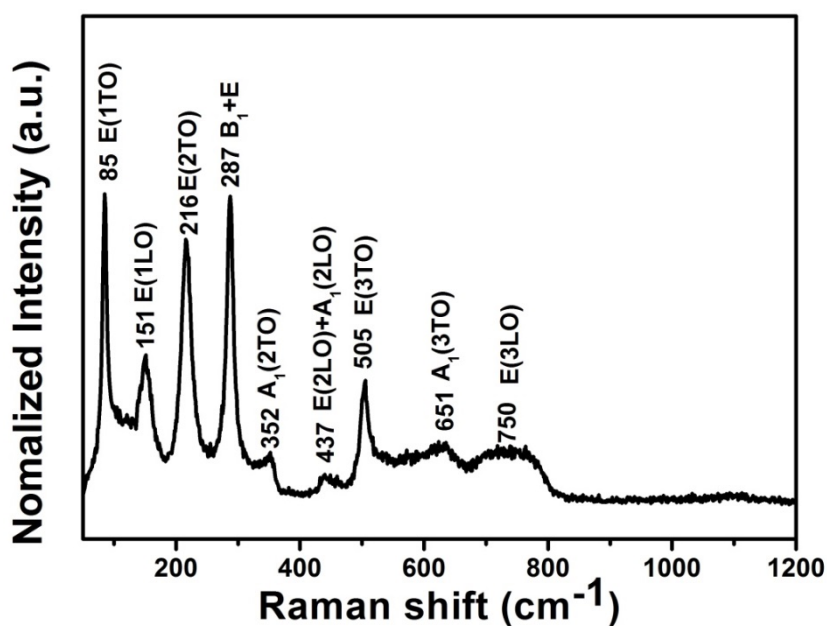

Figure S1 Raman spectrum of PbTiO<sub>3</sub> nanorods.

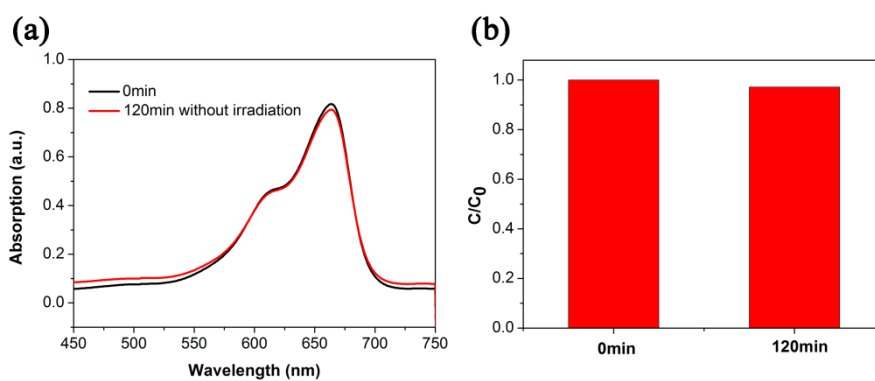

Figure S2. (a) Absorption spectra of the MB solution stirred for 120min without irradiation in the presence of heterostructured PbTiO<sub>3</sub>/CdS 25wt% nanorods as photocatalyst. (b) Bar plot showing the remaining methylene blue (MB) in solution with heterostructured PbTiO<sub>3</sub>/CdS 25wt% nanorods after stirring without irradiation for 120min.
